# Supplementary material for: Mixed metal CoII1−xZnIIx–organic frameworks based on chains with mixed carboxylate and azide bridges: magnetic coupling and slow relaxation
Source: Royal Society of Chemistry journal article supplement (doi:10.1039/c8ra03273d), 2018-01-01
Supplement: c8ra03273d1.pdf [file c8ra03273d1.pdf]

## Electronic Supplementary Information

### Mixed Metal $\text{Co}^{\text{II}}_{1-x}\text{Zn}^{\text{II}}_x$ -Organic Frameworks Based on Chains with Mixed Carboxylate and Azide Bridges: Magnetic Coupling and Slow Relaxation

Yan-Qin Wang, Kun Wang and En-Qing Gao\*

Table S1. Crystal data and structure refinements for compound **1**

| Compound                                           | <b>1</b>                                     |
|----------------------------------------------------|----------------------------------------------|
| Formula                                            | $\text{C}_8\text{H}_8\text{ZnN}_4\text{O}_5$ |
| Mr                                                 | 305.55                                       |
| Crystal system                                     | Orthorhombic                                 |
| space group                                        | <i>Pnma</i>                                  |
| <i>a</i> , Å                                       | 7.6089(18)                                   |
| <i>b</i> , Å                                       | 7.2802(17)                                   |
| <i>c</i> , Å                                       | 18.485(4)                                    |
| $\alpha$ , deg                                     | 90                                           |
| $\beta$ , deg                                      | 90                                           |
| $\gamma$ , deg                                     | 90                                           |
| <i>V</i> , Å <sup>3</sup>                          | 1024.0(4)                                    |
| <i>Z</i>                                           | 4                                            |
| <i>D<sub>c</sub></i> , g cm <sup>-3</sup>          | 1.982                                        |
| $\mu$ , mm <sup>-1</sup>                           | 2.421                                        |
| Unique.reflns/ <i>R</i> <sub>int</sub>             | 1262 / 0.0617                                |
| <i>R</i> <sub>1</sub> [ <i>I</i> > 2σ( <i>I</i> )] | 0.0438                                       |
| w <i>R</i> <sub>2</sub> (All data)                 | 0.1213                                       |
| GOF                                                | 1.015                                        |

Table S2. Bond distances (Å) and angles (deg) of **1**.

|             |            |             |            |
|-------------|------------|-------------|------------|
| Zn1-N1      | 2.096(2)   | Zn1-O2B     | 2.114(3)   |
| Zn1-O1      | 2.152(3)   | N1-Zn1-N1C  | 180.0      |
| N1-Zn1-O2B  | 91.82(15)  | N1C-Zn1-O2B | 88.18(15)  |
| O2B-Zn1-O2D | 180.000(1) | N1-Zn1-O1C  | 88.14(15)  |
| N1-Zn1-O1   | 91.86(15)  | O2B-Zn1-O1  | 88.09(12)  |
| O2D-Zn1-O1  | 91.91(12)  | O1C-Zn1-O1  | 180.000(1) |

Symmetry codes: B:  $x-1/2, y, -z+3/2$ ; C:  $-x+1, -y, -z+1$ ; D:  $-x+3/2, -y, z-1/2$ .

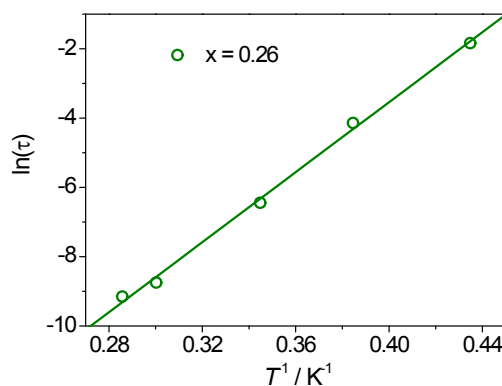

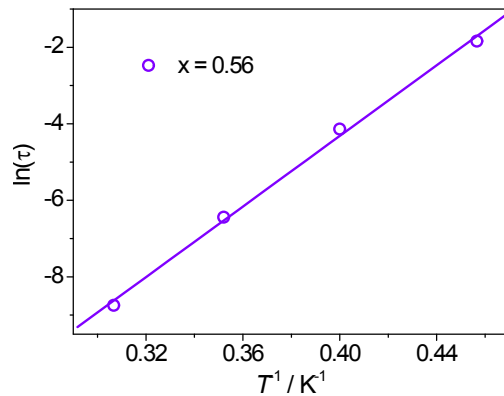

Fig. S1 The Arrhenius-law fits for the  $\text{Co}^{\text{II}}_{1-x}\text{Zn}^{\text{II}}_x$  materials ( $x = 0.26$  top;  $x = 0.56$  bottom).
